# Supplementary material
Source: MDPI journal article supplement (https://www.mdpi.com/2813-3757/1/3/11)
Supplement: s1 [file s1]

Archive with 1 entries (1 files):
- kinasesphosphatases-2430382-supplementary.pdf
